# Supplementary material for: Partial-Methylated HeyL Promoter Predicts the Severe Illness in Egyptian COVID-19 Patients
Source: Hindawi journal article supplement (doi:10.1155/2022/6780710), 2022-05-31
Supplement: f1 [file 6780710.f1.pdf]



Data analysis of the COVID-19 prevalence, incidence and death in Egypt vs most of countries by the end of first wave ( Dec. 2020) to date (mid Jan. 2022)

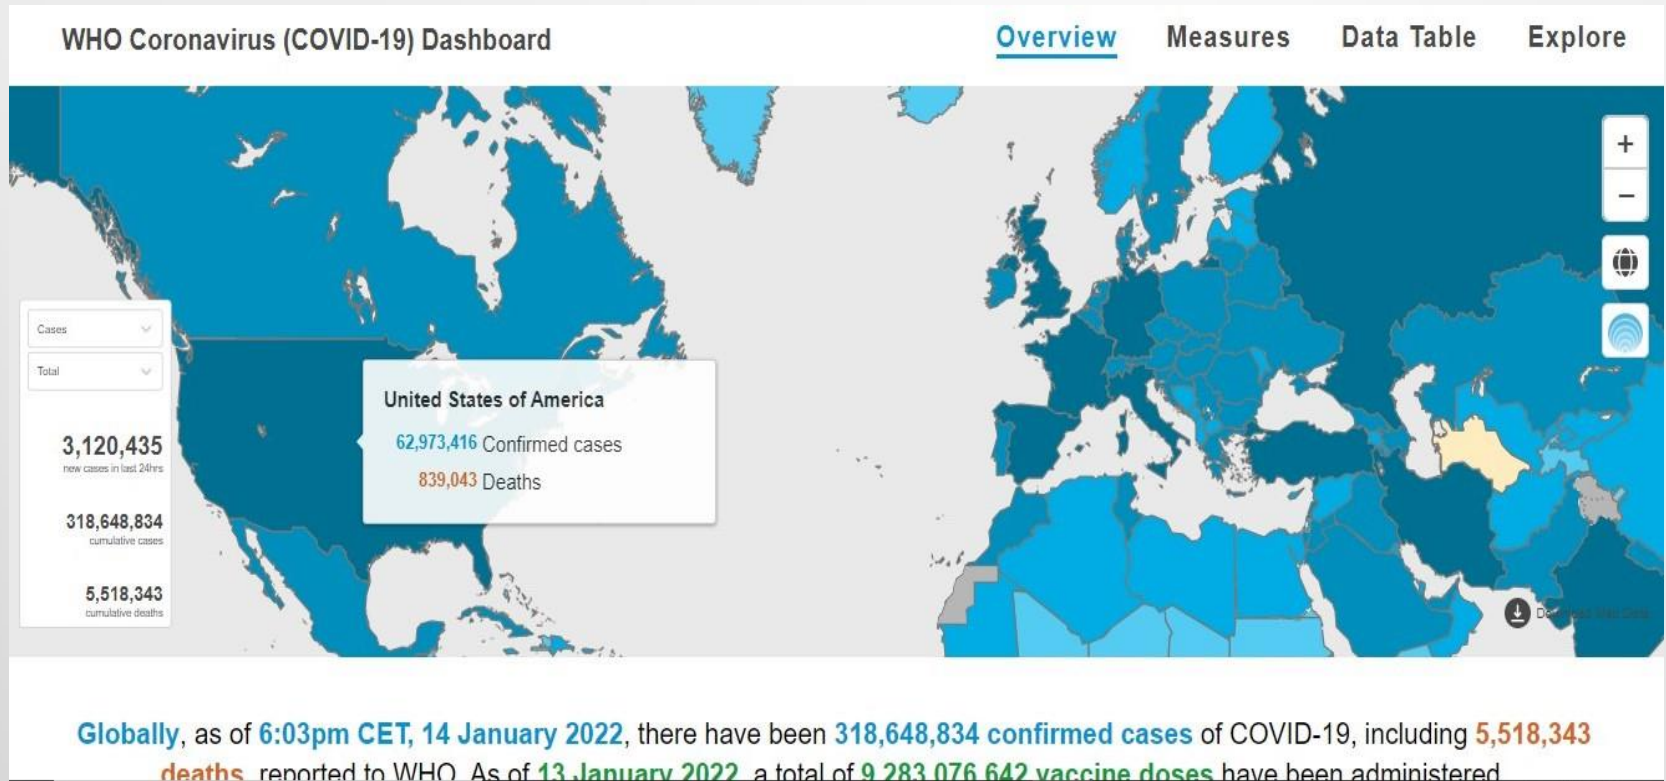

Figure 1: presenting confirmed cumulative cases of COVID-19 and related deaths in USA by mid Jan. 2022

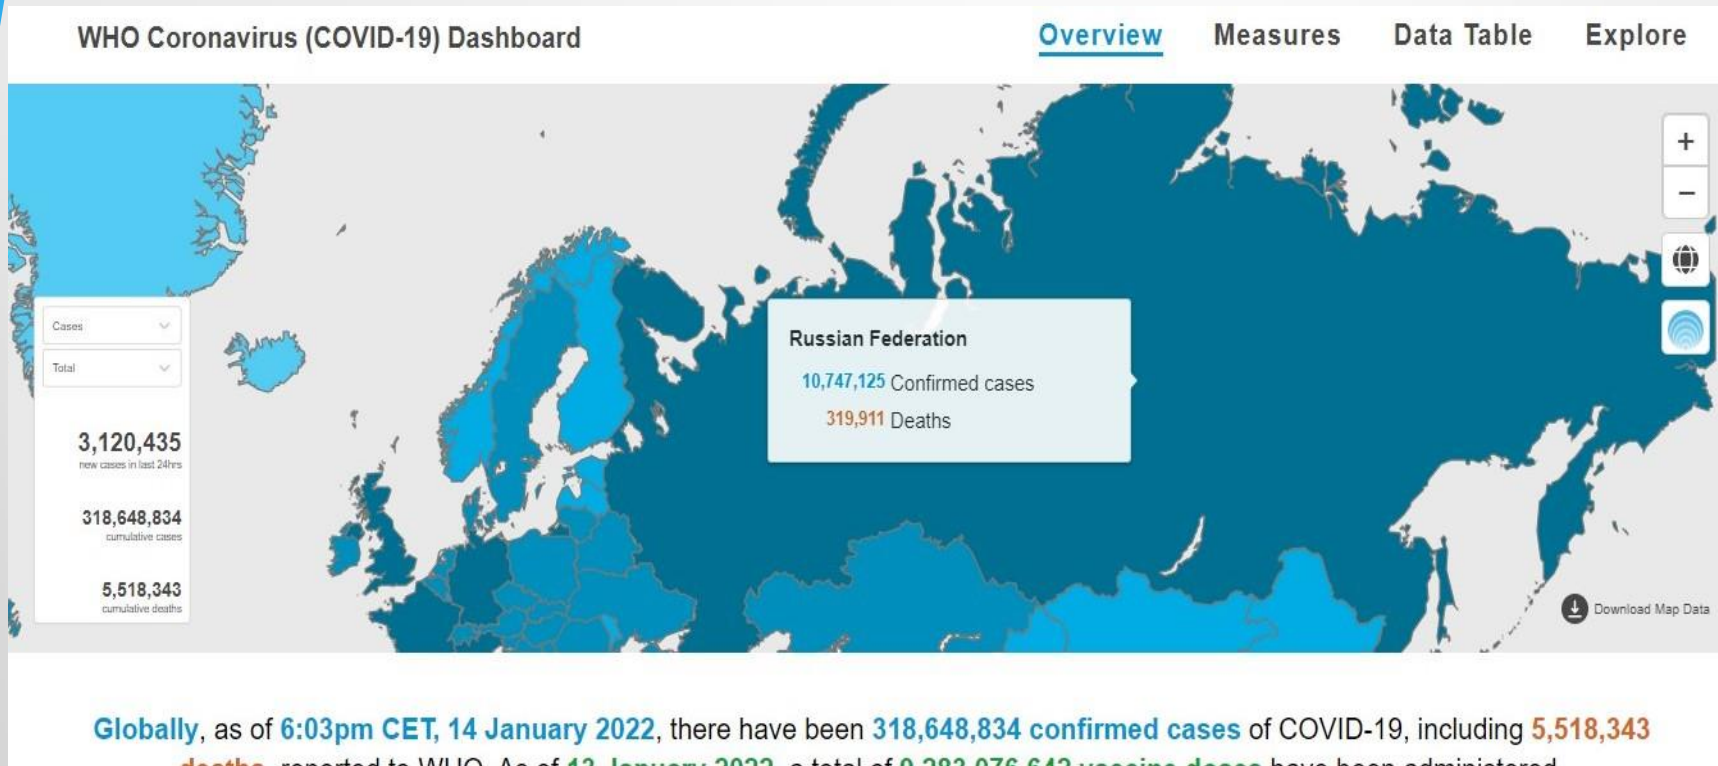

Figure 2: presenting confirmed cumulative cases of COVID-19 and deaths in Russia by mid Jan. 2022

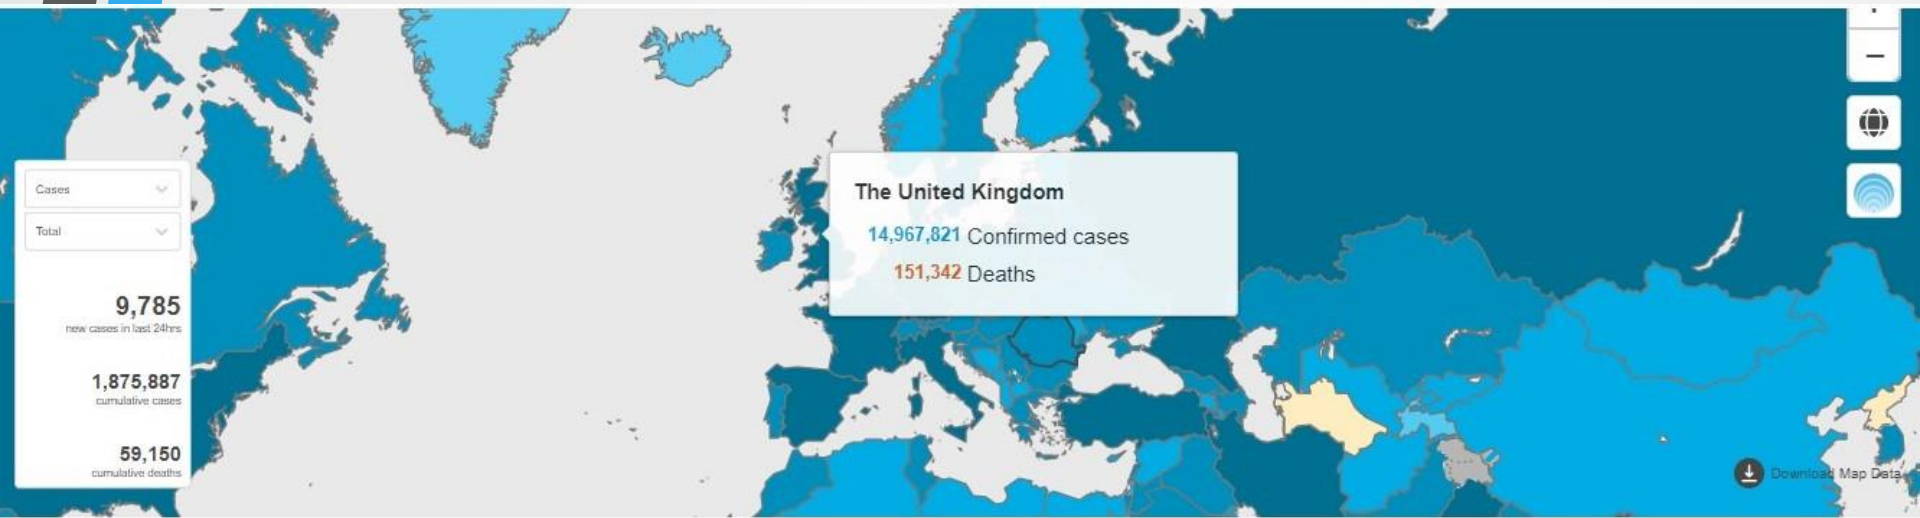

In **Romania**, from **3 January 2020** to **6:03pm CET, 14 January 2022**, there have been **1,875,887 confirmed cases** of COVID-19 with **59,150 deaths**, reported to WHO. As of **8 January 2022**, a total of **15,228,027 vaccine doses** have been administered.

Figure 3: presenting confirmed cumulative cases of COVID-19 and deaths in United Kingdom by mid Jan. 2022

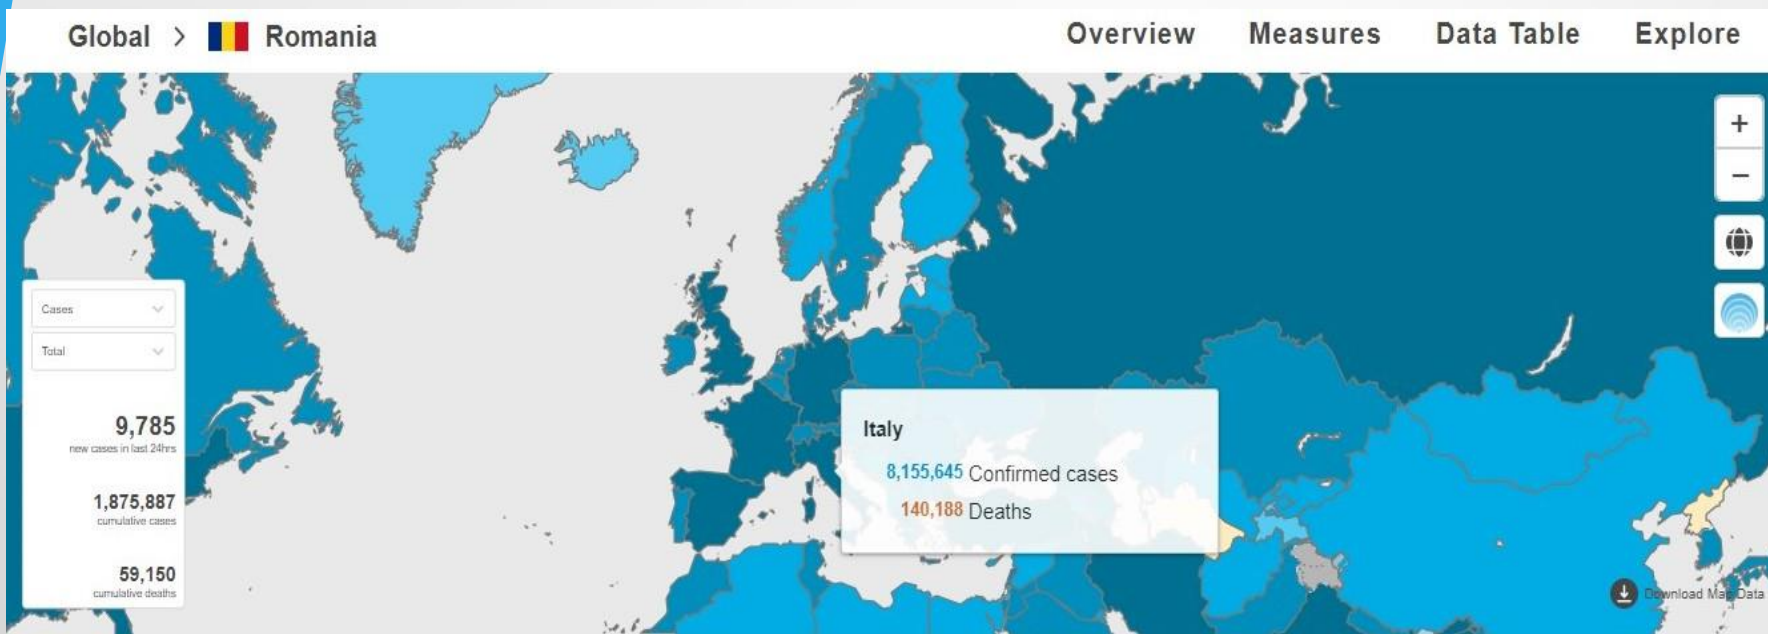

In **Romania**, from **3 January 2020** to **6:03pm CET, 14 January 2022**, there have been **1,875,887 confirmed cases** of COVID-19 with **59.150 deaths**. reported to WHO. As of **8 January 2022**, a total of **15.228.027 vaccine doses** have been administered.

Figure 4: presenting confirmed cumulative cases of COVID-19 and deaths in Italy by mid Jan. 2022.



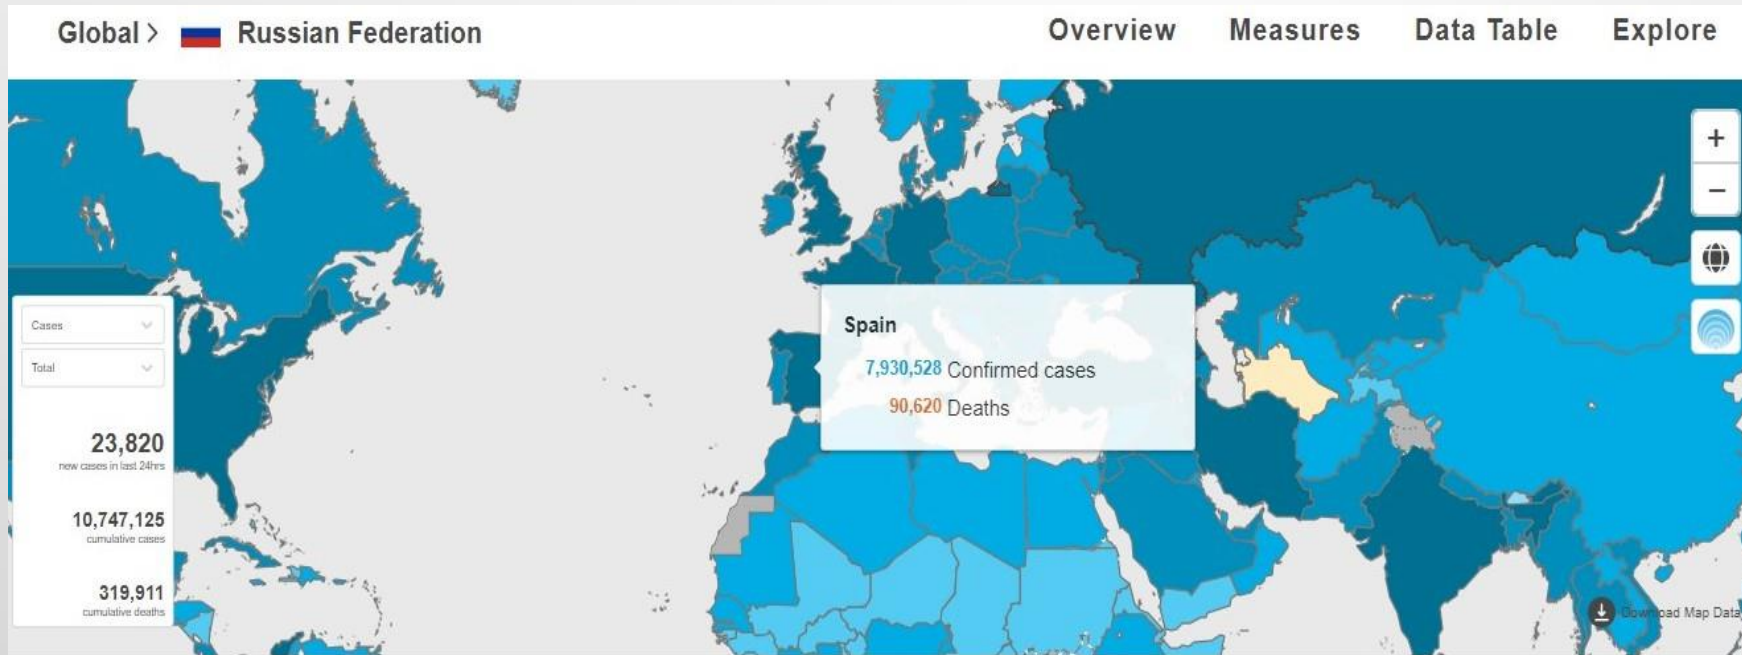

In **Russian Federation**, from **3 January 2020** to **6:03pm CET, 14 January 2022**, there have been **10,747,125 confirmed cases** of COVID-19 with **319,911 deaths** reported to WHO. As of **20 December 2021**, a total of **140,161,780** vaccine doses have been

Figure 5: presenting confirmed cumulative cases of COVID-19 and deaths in Spain by mid Jan. 2022.

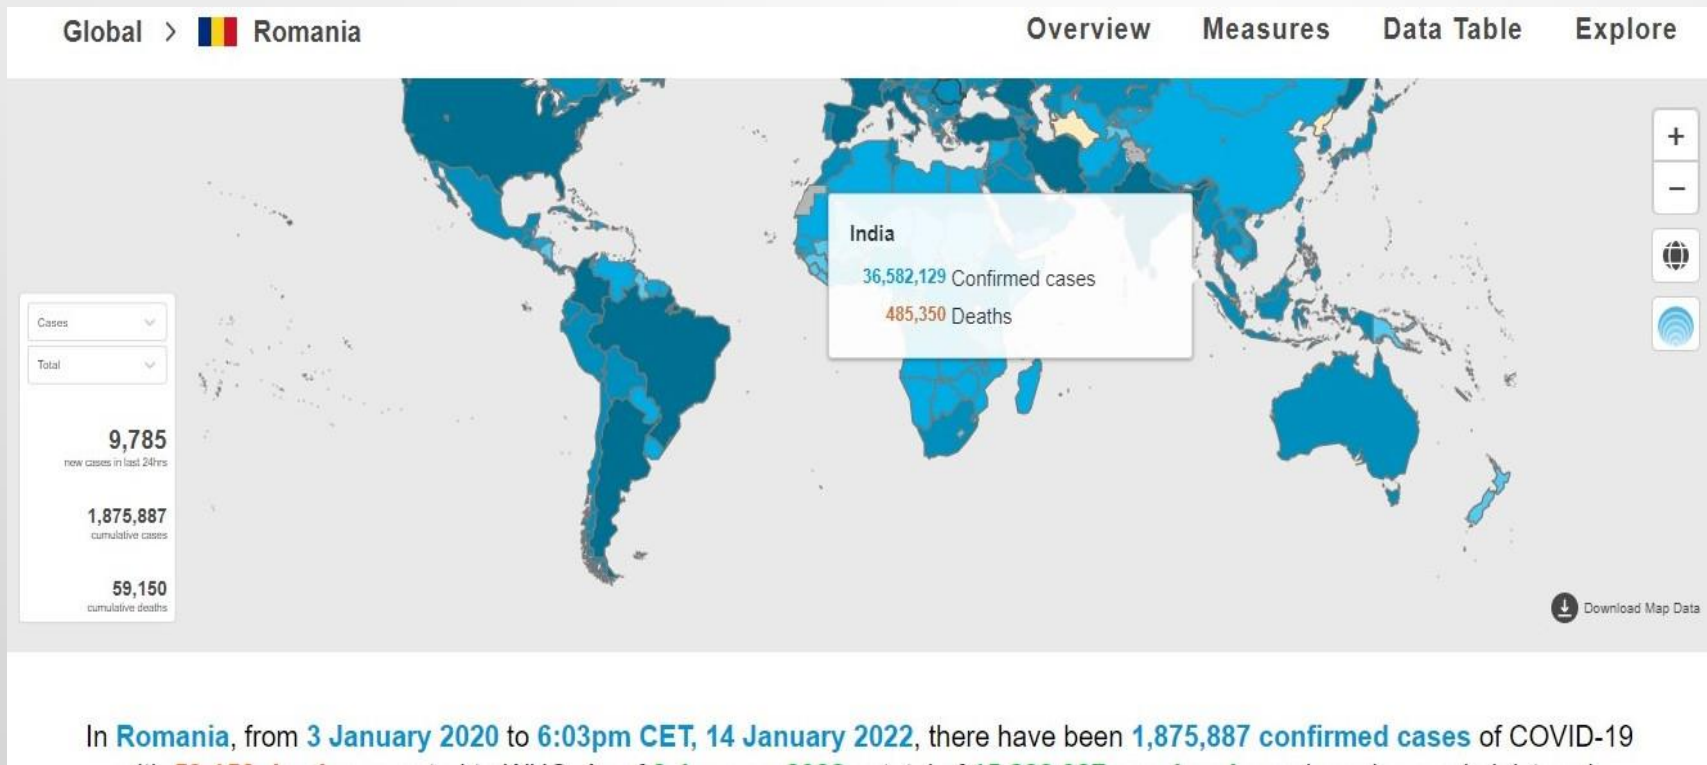

Figure 6: presenting confirmed cumulative cases of COVID-19 and deaths in India by mid Jan. 2022.

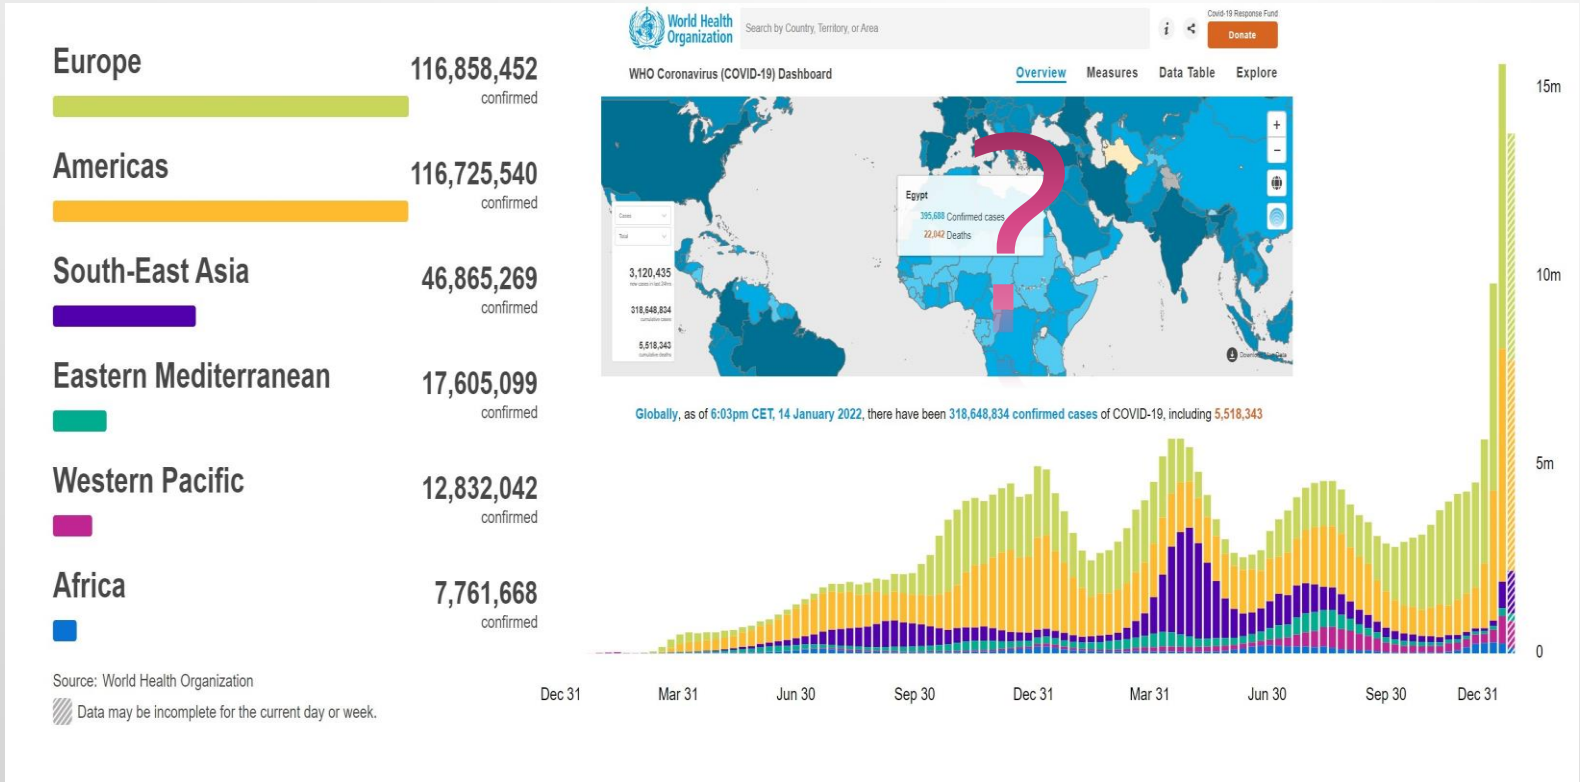

Figure 7: presenting confirmed cumulative cases of COVID-19 and related deaths in Egypt compared to the that worldwide (upper right ), graphical presentation of COVID-19 cases among different continents to the end of 2021 (lower right), confirmed cumulative cases of COVID-19 in different continents by January 2022( left side)



# Cumulative cases by the end of 2020

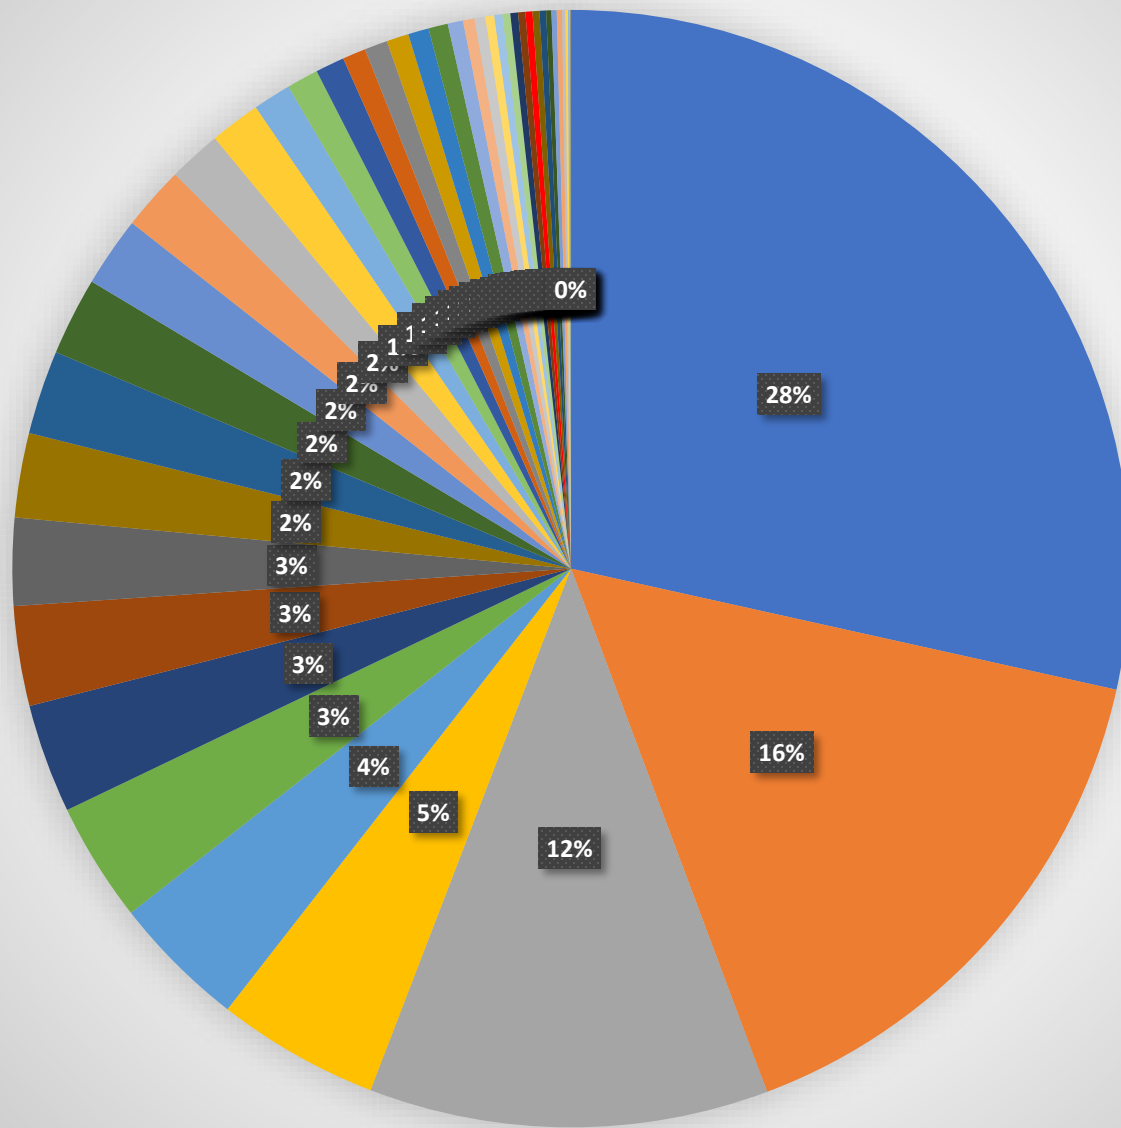

| Rank      | Country      | Cumulative Cases |
|-----------|--------------|------------------|
| 1         | USA          | 18311405         |
| 2         | India        | 10169118         |
| 3         | Brazil       | 7425593          |
| 4         | Russia       | 3021964          |
| 5         | France       | 2505074          |
| 6         | England      | 2221316          |
| 7         | Italy        | 2028354          |
| 8         | Spain        | 1854951          |
| 9         | Germany      | 1627103          |
| 10        | Argentina    | 1571680          |
| 11        | Colombia     | 1559766          |
| 12        | Mexico       | 1450679          |
| 13        | Turkey       | 1303917          |
| 14        | Iran         | 1189203          |
| 15        | South Africa | 983359           |
| 16        | Poland       | 942549           |
| 17        | Indonesia    | 706837           |
| 18        | Iraq         | 589943           |
| 19        | Canada       | 539298           |
| 20        | Switzerland  | 433002           |
| 21        | Morocco      | 428193           |
| 22        | Sweden       | 412370           |
| 23        | Israel       | 383715           |
| 24        | Saudi Arabia | 361903           |
| 25        | Jordan       | 285306           |
| 26        | Japan        | 213547           |
| 27        | Emirates     | 199665           |
| 28        | Lebanon      | 168069           |
| 29        | Kuwait       | 149277           |
| 30        | Palestine    | 147234           |
| 31        | Qatar        | 142734           |
| 32        | Greece       | 134852           |
| <b>33</b> | <b>Egypt</b> | <b>130126</b>    |
| 34        | Tunisia      | 128578           |
| 35        | Ethiopia     | 121880           |
| 36        | Libya        | 97653            |
| 37        | Algeria      | 97441            |
| 38        | China        | 96240            |
| 39        | Singapore    | 58509            |
| 40        | Afghanistan  | 51764            |
| 41        | Australia    | 28296            |
| 42        | Angola       | 17099            |
| 43        | Somalia      | 4690             |
| 44        | South Sudan  | 3308             |
| 45        | Nigeria      | 2803             |

Figure 8: pie chart presenting the percentage of cumulative cases of COVID-19 cases among the studied countries by the end of 2020 (left), ranking of cumulative cases showing the order of Egypt that's written in red (right).

# New cases by the end of 2020

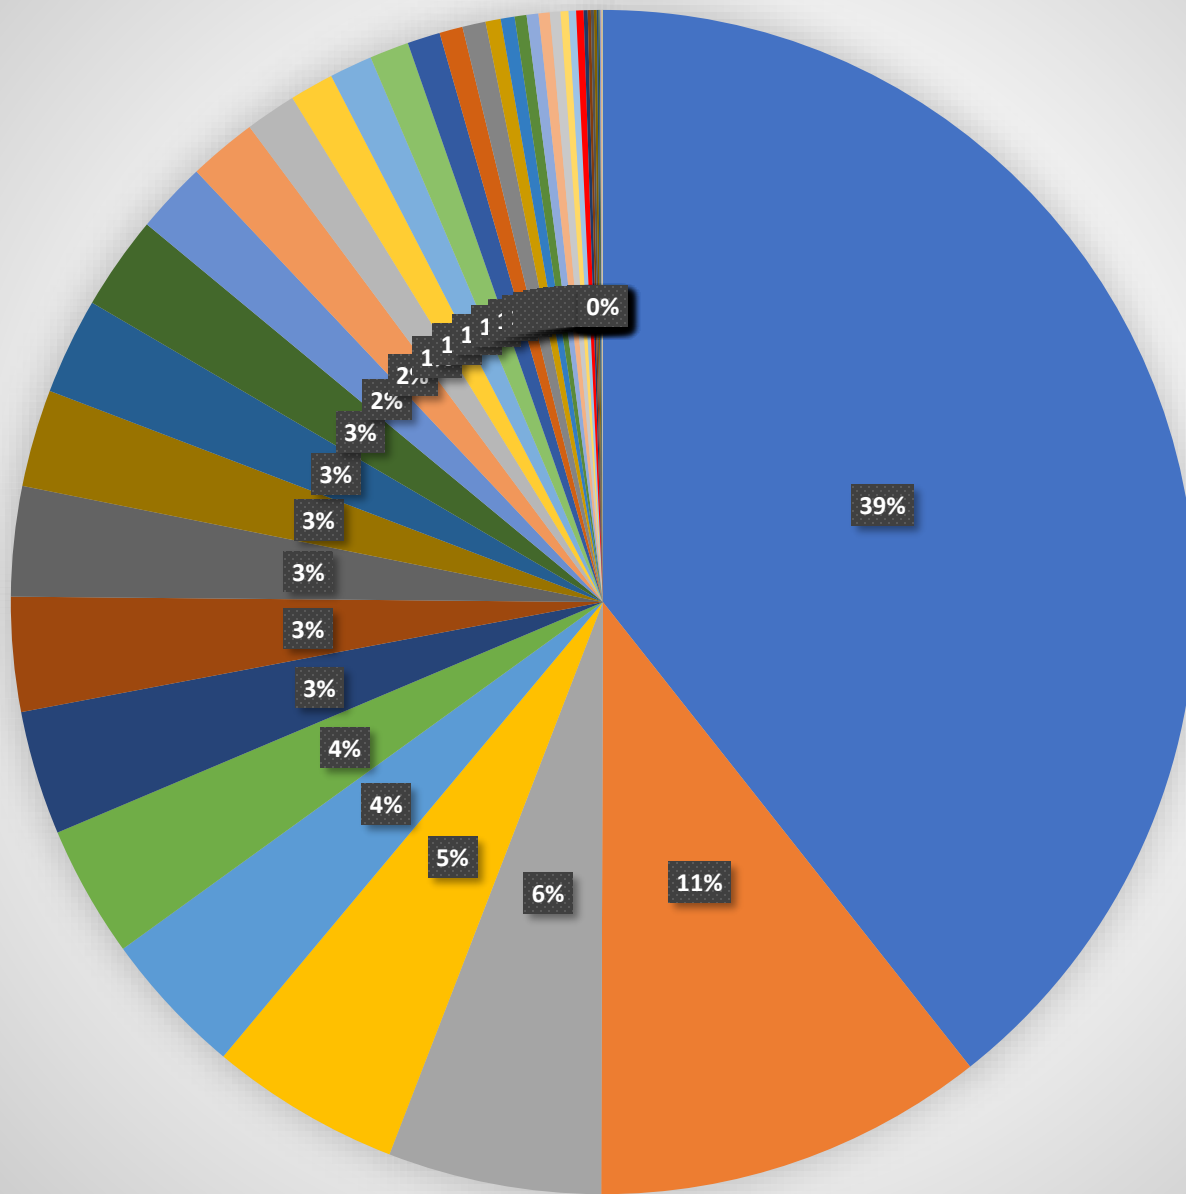

| Rank | Country      | New_cases   |
|------|--------------|-------------|
| 1    | USA          | 221145      |
| 2    | Brazil       | 60076       |
| 3    | England      | 32725       |
| 4    | Russia       | 29258       |
| 5    | India        | 22273       |
| 6    | France       | 20199       |
| 7    | Italy        | 19037       |
| 8    | Turkey       | 17543       |
| 9    | Poland       | 16846       |
| 10   | Colombia     | 14940       |
| 11   | South Africa | 14796       |
| 12   | Germany      | 14455       |
| 13   | Canada       | 10944       |
| 14   | Mexico       | 10480       |
| 15   | Argentina    | 7815        |
| 16   | Indonesia    | 6740        |
| 17   | Spain        | 6581        |
| 18   | Iran         | 6021        |
| 19   | Sweden       | 5036        |
| 20   | Japan        | 3567        |
| 21   | Israel       | 3563        |
| 22   | Morocco      | 2329        |
| 23   | Lebanon      | 2136        |
| 24   | Tunisia      | 1826        |
| 25   | Palestine    | 1812        |
| 26   | Switzerland  | 1721        |
| 27   | Jordan       | 1616        |
| 28   | Emirates     | 1230        |
| 29   | Iraq         | 1140        |
| 30   | <b>Egypt</b> | <b>1133</b> |
| 31   | Greece       | 617         |
| 32   | Ethiopia     | 481         |
| 33   | Libya        | 461         |
| 34   | Algeria      | 434         |
| 35   | Kuwait       | 260         |
| 36   | Saudi        | 178         |
| 37   | Afghanistan  | 169         |
| 38   | Qatar        | 129         |
| 39   | China        | 81          |
| 40   | Angola       | 70          |
| 41   | Australia    | 34          |
| 42   | Singapore    | 14          |
| 43   | Somalia      | 0           |
| 44   | South Sudan  | 0           |
| 45   | Nigeria      | 0           |

Figure 9: pie chart presenting the percentage of new cases of COVID-19 among the studied countries by the end of 2020 (left), ranking of new cases showing the order of Egypt that's written in red (right).

# Cumulative deaths by the end of 2020

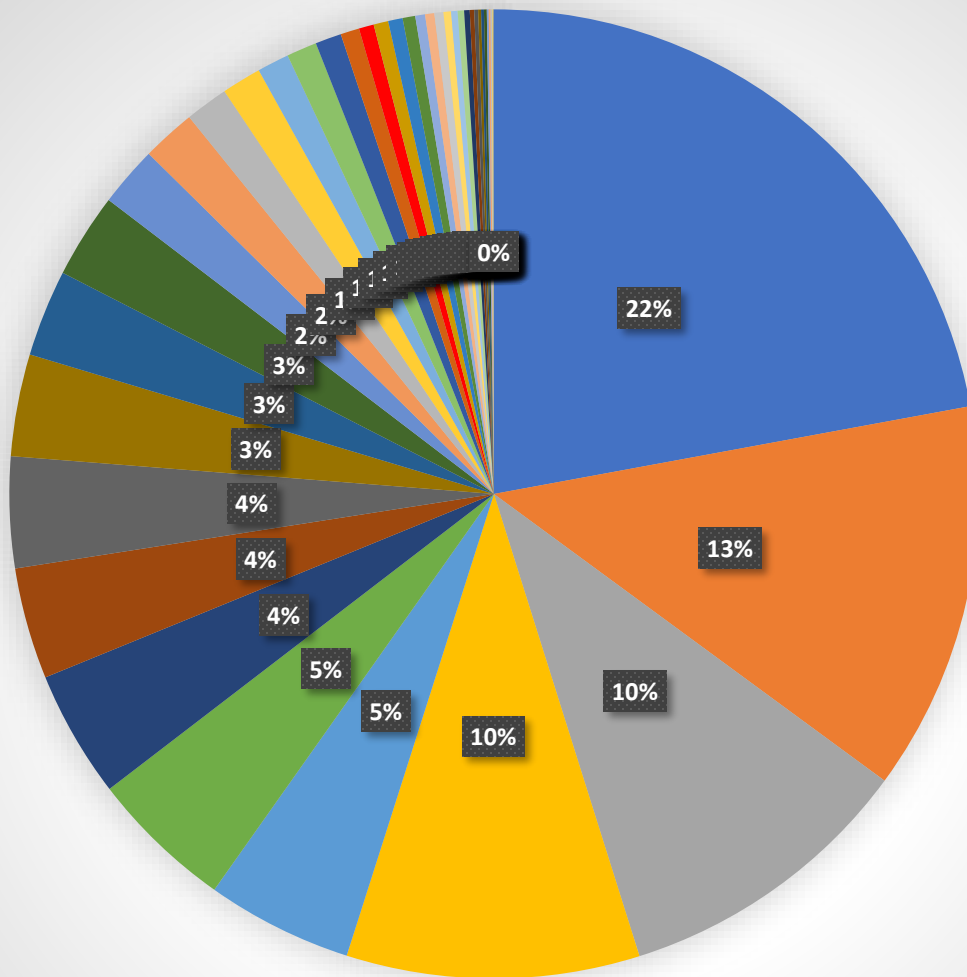

| Rank | Country      | Cumulative deaths |
|------|--------------|-------------------|
| 1    | USA          | 323527            |
| 2    | Brazil       | 190006            |
| 3    | India        | 147343            |
| 4    | Mexico       | 143054            |
| 5    | Italy        | 71359             |
| 6    | England      | 70195             |
| 7    | France       | 62051             |
| 8    | Iran         | 54440             |
| 9    | Russia       | 54226             |
| 10   | Spain        | 49824             |
| 11   | Argentina    | 42392             |
| 12   | Colombia     | 41454             |
| 13   | Germany      | 29422             |
| 14   | South Africa | 26276             |
| 15   | Indonesia    | 20994             |
| 16   | Turkey       | 19371             |
| 17   | Poland       | 15592             |
| 18   | Canada       | 14781             |
| 19   | Iraq         | 12755             |
| 20   | Sweden       | 9166              |
| 21   | <b>Egypt</b> | <b>7309</b>       |
| 22   | Morocco      | 7170              |
| 23   | Switzerland  | 7075              |
| 24   | Saudi        | 6168              |
| 25   | China        | 4777              |
| 26   | Greece       | 4507              |
| 27   | Tunisia      | 4385              |
| 28   | Jordan       | 3711              |
| 29   | Japan        | 3155              |
| 30   | Israel       | 3138              |
| 31   | Algeria      | 2716              |
| 32   | Afghanistan  | 2148              |
| 33   | Ethiopia     | 1897              |
| 34   | Libya        | 1415              |
| 35   | Palestine    | 1385              |
| 36   | Lebanon      | 1367              |
| 37   | Kuwait       | 926               |
| 38   | Australia    | 908               |
| 39   | Emirates     | 653               |
| 40   | Angola       | 396               |
| 41   | Qatar        | 244               |
| 42   | Somalia      | 127               |
| 43   | Nigeria      | 89                |
| 44   | South Sudan  | 62                |
| 45   | Singapore    | 29                |

Figure 10: pie chart presenting the percentage of cumulative deaths related to COVID-19 among the studied countries by the end of 2020 (left), ranking of cumulative deaths showing the order of Egypt that's written in red

# New deaths by the end of 2020

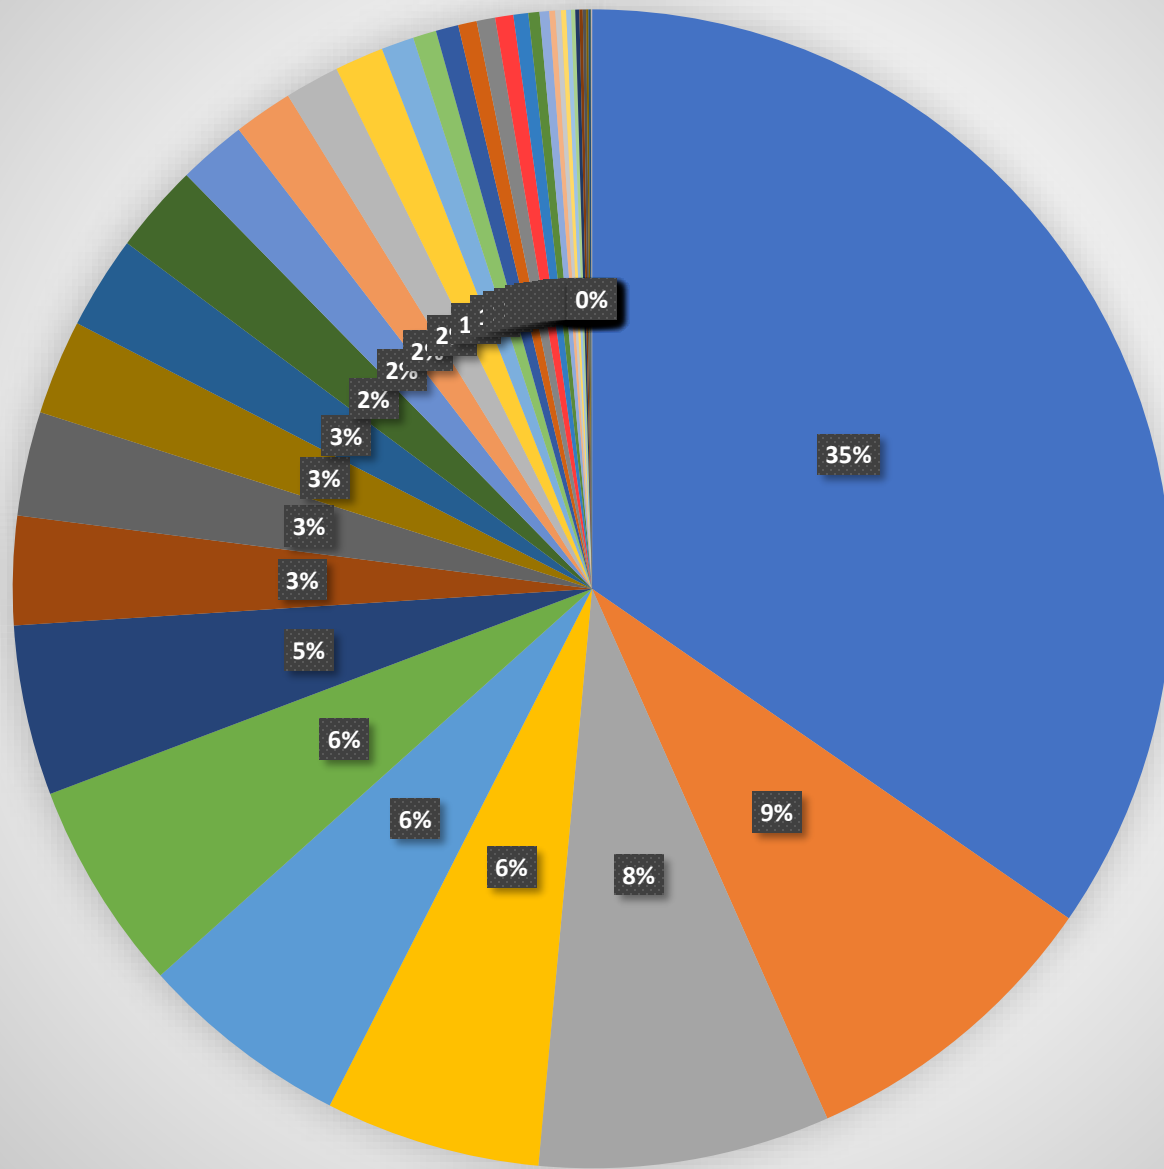

|           | country      | New_deaths |
|-----------|--------------|------------|
| 1         | USA          | 3347       |
| 2         | Mexico       | 843        |
| 3         | Brazil       | 786        |
| 4         | Poland       | 580        |
| 5         | England      | 570        |
| 6         | Russia       | 567        |
| 7         | Italy        | 459        |
| 8         | South Africa | 293        |
| 9         | Colombia     | 281        |
| 10        | Turkey       | 256        |
| 11        | India        | 251        |
| 12        | Germany      | 240        |
| 13        | Canada       | 184        |
| 14        | France       | 159        |
| 15        | Indonesia    | 147        |
| 16        | Iran         | 132        |
| 17        | Sweden       | 88         |
| 18        | Switzerland  | 63         |
| 19        | Tunisia      | 61         |
| 20        | Greece       | 50         |
| 21        | Japan        | 50         |
| <b>22</b> | <b>Egypt</b> | <b>49</b>  |
| 23        | Morocco      | 40         |
| 24        | Jordan       | 30         |
| 25        | Spain        | 26         |
| 26        | Libya        | 16         |
| 27        | Ethiopia     | 15         |
| 28        | Lebanon      | 14         |
| 29        | Afghanistan  | 13         |
| 30        | Iraq         | 11         |
| 31        | Algeria      | 11         |
| 32        | Saudi        | 9          |
| 33        | Albania      | 9          |
| 34        | Emirates     | 6          |
| 35        | Israel       | 6          |
| 36        | China        | 1          |
| 37        | Qatar        | 1          |
| 38        | Angola       | 1          |
| 39        | Qatar        | 1          |
| 40        | Somalia      | 0          |
| 41        | South Sudan  | 0          |
| 42        | Kuwait       | 0          |
| 43        | Singapore    | 0          |
| 44        | Nigeria      | 0          |
| 45        | Australia    | 0          |

Figure 11: pie chart presenting the percentage of new deaths related to COVID-19 among the studied countries by the end of 2020 (left), ranking of new deaths showing the order of Egypt that's written in red (right).

# Cumulative cases COVID-19 (14/1/2022)

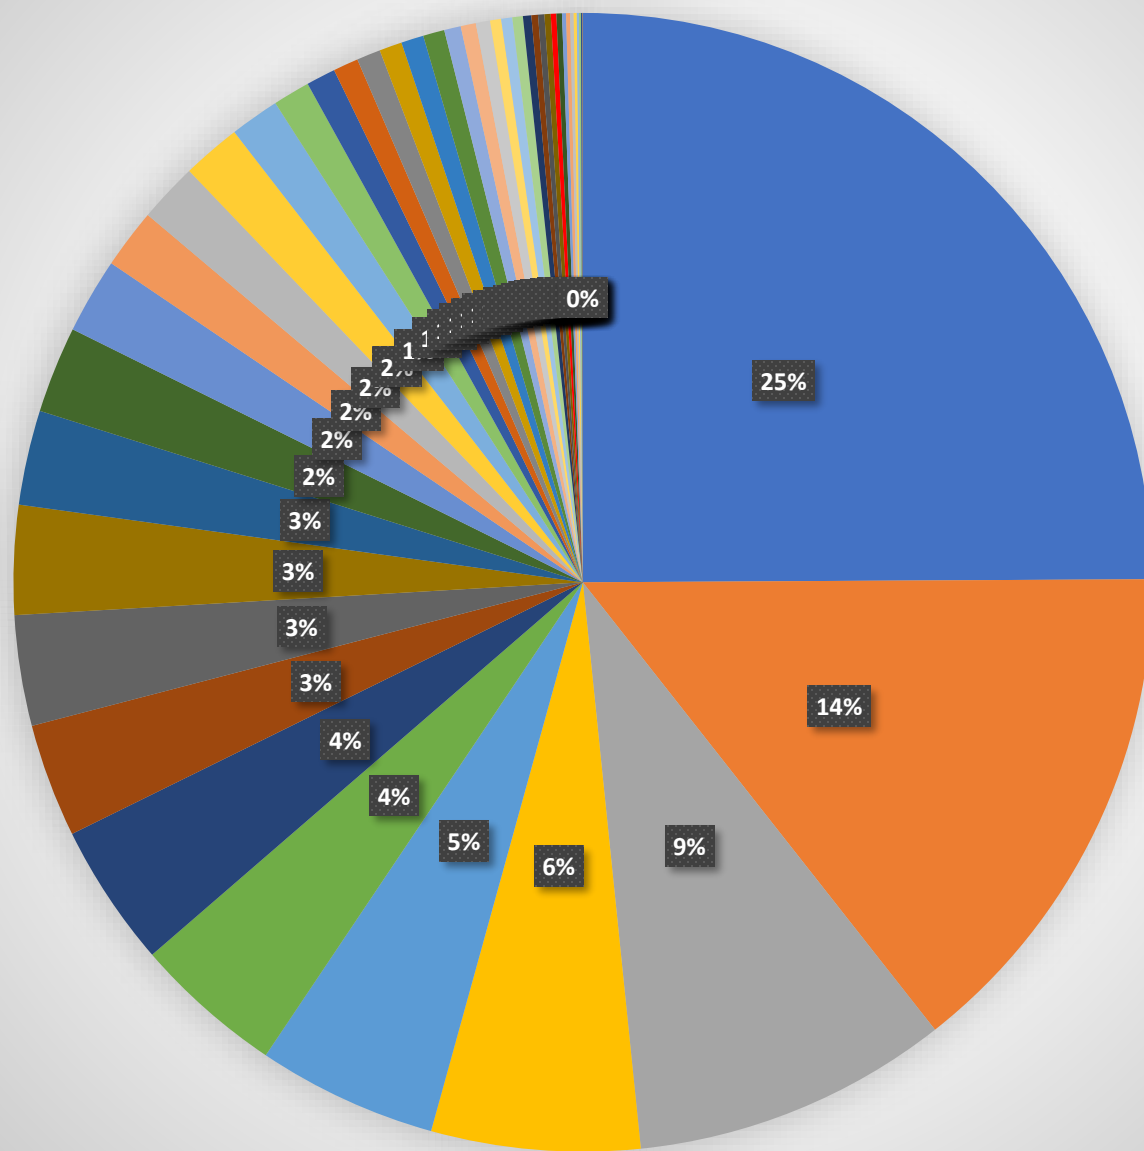

| Rank | Country      | Cumulative COVID-19 cases |
|------|--------------|---------------------------|
| 1    | USA          | 62973416                  |
| 2    | India        | 36582129                  |
| 3    | Brazil       | 22716091                  |
| 4    | England      | 14967821                  |
| 5    | France       | 12903125                  |
| 6    | Russia       | 10747125                  |
| 7    | Turkey       | 10270349                  |
| 8    | Italy        | 8155645                   |
| 9    | Spain        | 7930528                   |
| 10   | Germany      | 7835451                   |
| 11   | Argentina    | 6793119                   |
| 12   | Iran         | 6214781                   |
| 13   | Colombia     | 5410698                   |
| 14   | Poland       | 4281482                   |
| 15   | Indonesia    | 4269740                   |
| 16   | Mexico       | 4214253                   |
| 17   | South Africa | 3546808                   |
| 18   | Canada       | 2657384                   |
| 19   | Iraq         | 2104940                   |
| 20   | Japan        | 1809010                   |
| 21   | Israel       | 1708920                   |
| 22   | Switzerland  | 1627238                   |
| 23   | Greece       | 1612869                   |
| 24   | Sweden       | 1534797                   |
| 25   | Australia    | 1195158                   |
| 26   | Jordan       | 1088329                   |
| 27   | Morocco      | 1017560                   |
| 28   | Emirates     | 795997                    |
| 29   | Lebanon      | 794744                    |
| 30   | Tunisia      | 756155                    |
| 31   | Saudi        | 599044                    |
| 32   | Palestine    | 474234                    |
| 33   | Ethiopia     | 453128                    |
| 34   | Kuwait       | 451430                    |
| 35   | <b>Egypt</b> | <b>395688</b>             |
| 36   | Libya        | 395687                    |
| 37   | Singapore    | 289085                    |
| 38   | Qatar        | 287091                    |
| 39   | Nigeria      | 250009                    |
| 40   | Algeria      | 224383                    |
| 41   | Afghanistan  | 158602                    |
| 42   | China        | 135299                    |
| 43   | Angola       | 92581                     |
| 44   | Somalia      | 24261                     |
| 45   | South Sudan  | 16454                     |

Figure 12: pie chart presenting the percentage of cumulative cases of COVID-19 among the studied countries by mid of Jan. 2022 (left), ranking of cumulative cases showing the order of Egypt that's written in red (right).



# New cases COVID-19 (14/1/2022)

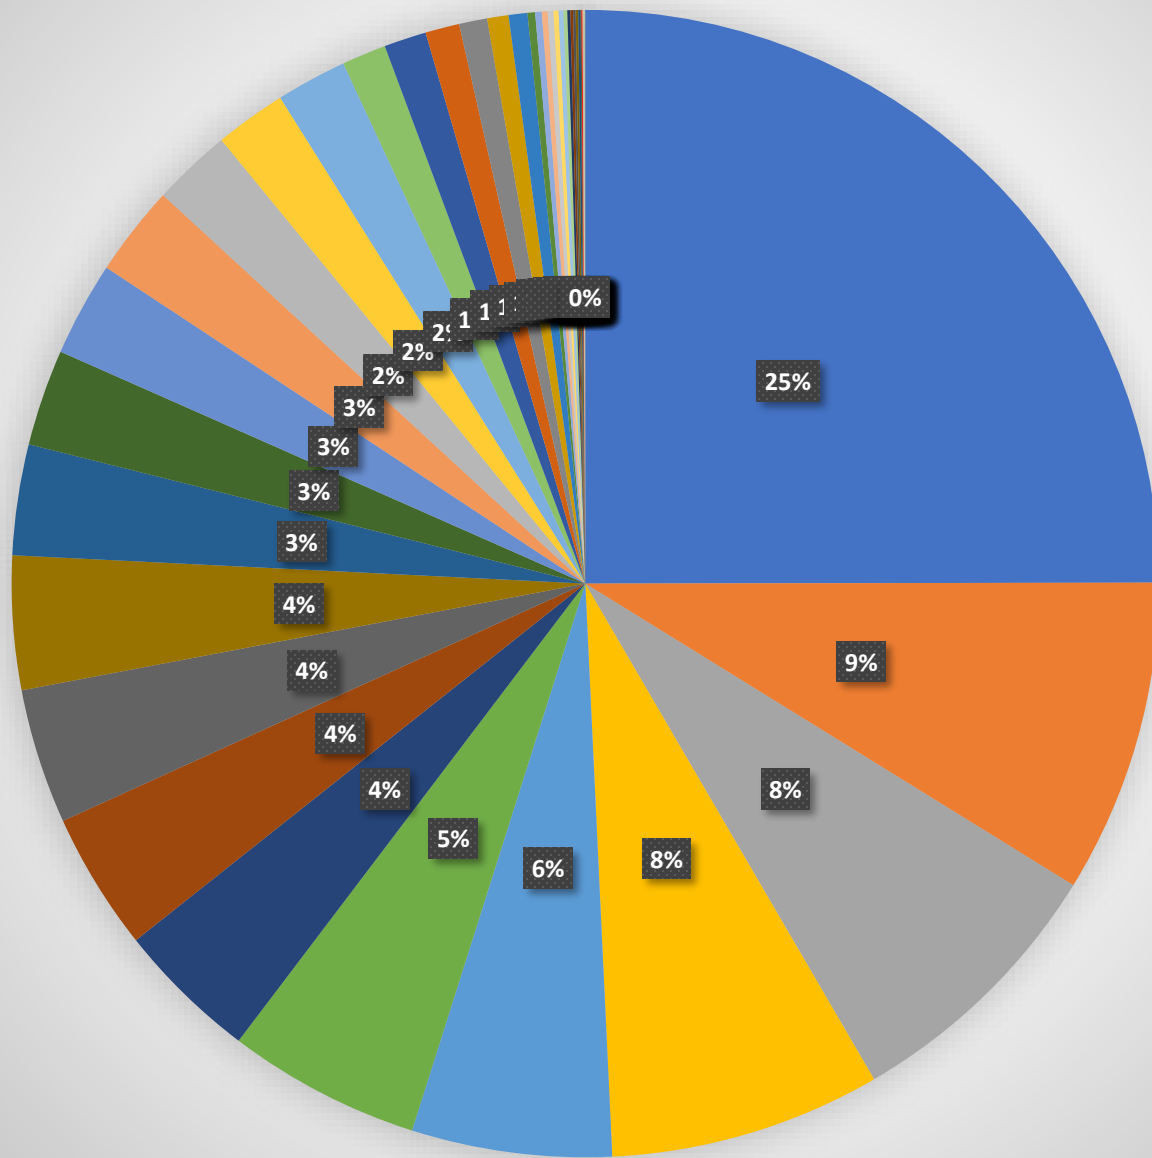

| Rank      | Country      | New_cases COVID-19 |
|-----------|--------------|--------------------|
| 1         | USA          | 847054             |
| 2         | France       | 299803             |
| 3         | India        | 264202             |
| 4         | Argentina    | 259484             |
| 5         | Colombia     | 191065             |
| 6         | Italy        | 184577             |
| 7         | Sweden       | 135545             |
| 8         | Switzerland  | 132024             |
| 9         | Russia       | 129090             |
| 10        | Mexico       | 127803             |
| 11        | England      | 105679             |
| 12        | Germany      | 92223              |
| 13        | Poland       | 90289              |
| 14        | Brazil       | 86631              |
| 15        | Turkey       | 75564              |
| 16        | Australia    | 68250              |
| 17        | Spain        | 67610              |
| 18        | South Africa | 42254              |
| 19        | Israel       | 40430              |
| 20        | Canada       | 32597              |
| 21        | Qatar        | 26808              |
| 22        | Greece       | 20409              |
| 23        | Japan        | 17940              |
| 24        | Lebanon      | 7246               |
| 25        | Tunsia       | 6323               |
| 26        | Morcco       | 5518               |
| 27        | Saudi        | 5499               |
| 28        | Kuawit       | 4883               |
| 29        | Indonsia     | 4553               |
| 30        | Algeria      | 3585               |
| 31        | Jordan       | 2829               |
| 32        | Emirates     | 2683               |
| 33        | Iran         | 2394               |
| 34        | Iraq         | 2385               |
| 35        | Ethiopia     | 2131               |
| 36        | Singapore    | 960                |
| <b>37</b> | <b>Egypt</b> | <b>948</b>         |
| 38        | Angola       | 674                |
| 39        | Libya        | 618                |
| 40        | Palestine    | 501                |
| 41        | Nigeria      | 423                |
| 42        | China        | 280                |
| 43        | Afghanistan  | 91                 |
| 44        | south sudan  | 47                 |
| 45        | Somalia      | 0                  |

Figure 13: pie chart presenting the percentage of new cases of COVID-19 among the studied countries by mid of Jan. 2022 (left), ranking of new cases showing the order of Egypt that's written in red (right).

# Cumulative deaths COVID-19 (14/1/2022)

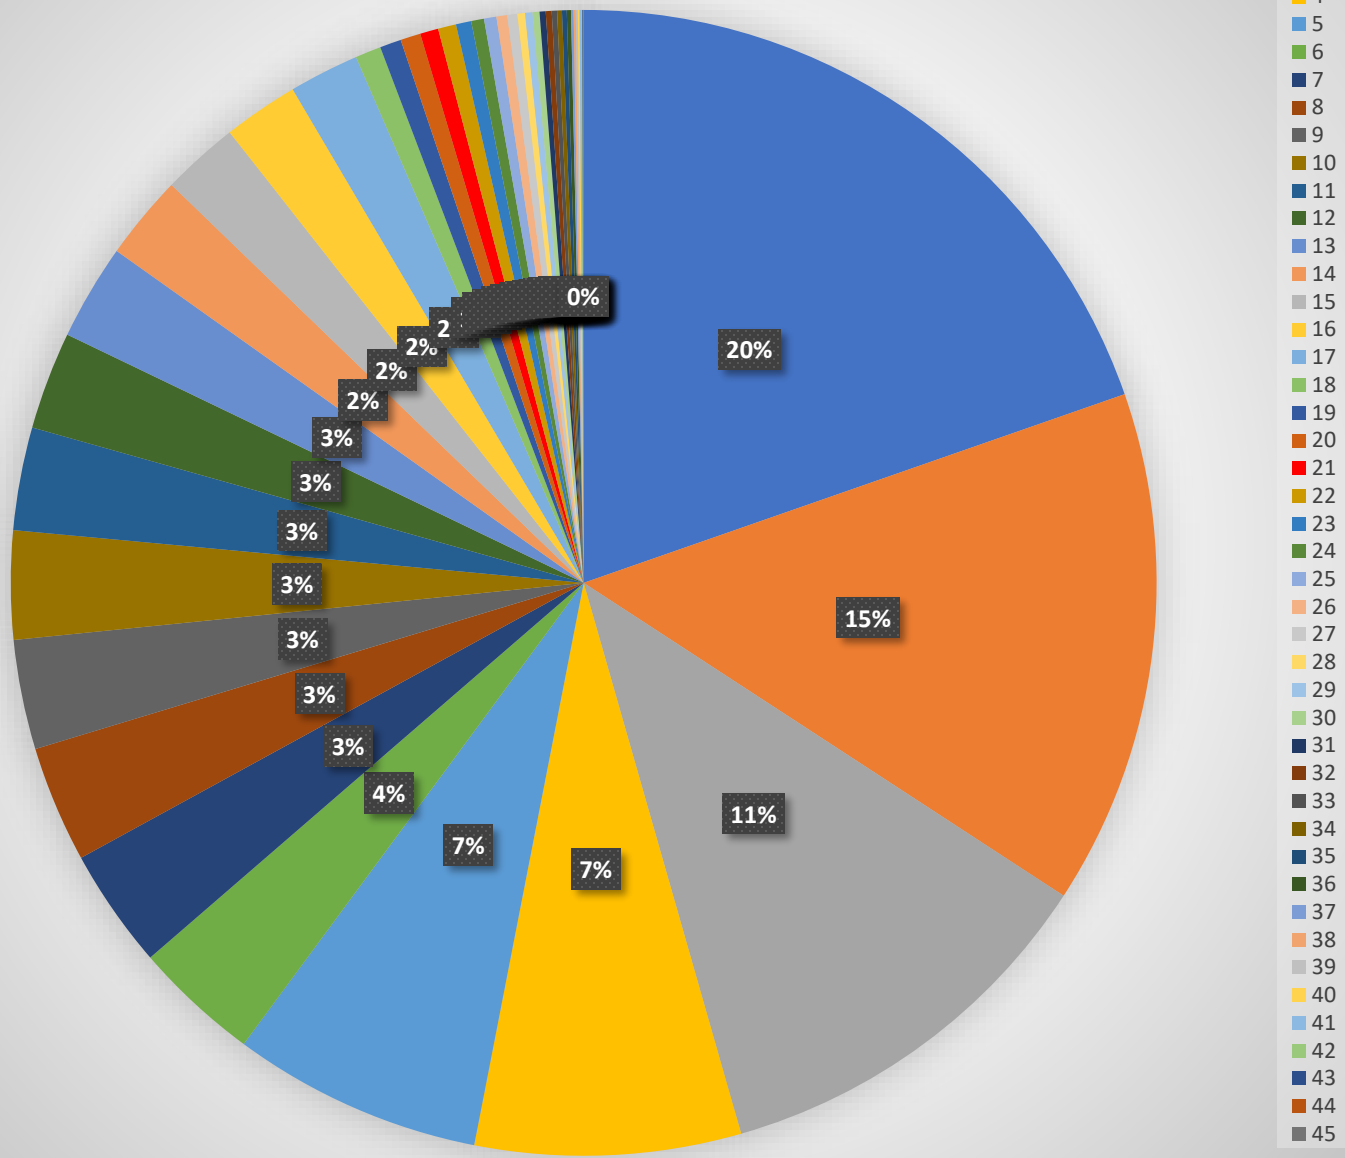

| Rank | Country      | Cumulative deaths COVID-19 |
|------|--------------|----------------------------|
| 1    | USA          | 839043                     |
| 2    | Brazil       | 620371                     |
| 3    | India        | 485350                     |
| 4    | Russia       | 319911                     |
| 5    | Mexico       | 300764                     |
| 6    | England      | 151342                     |
| 7    | Indonesia    | 144163                     |
| 8    | Italy        | 140188                     |
| 9    | Iran         | 132002                     |
| 10   | Colombia     | 130529                     |
| 11   | France       | 123893                     |
| 12   | Argentina    | 117808                     |
| 13   | Germany      | 115337                     |
| 14   | Poland       | 101841                     |
| 15   | South Africa | 92989                      |
| 16   | Spain        | 90620                      |
| 17   | Turkey       | 84278                      |
| 18   | Canada       | 31082                      |
| 19   | Tunisia      | 25731                      |
| 20   | Iraq         | 24229                      |
| 21   | <b>Egypt</b> | <b>22042</b>               |
| 22   | Greece       | 21732                      |
| 23   | JAPAN        | 18414                      |
| 24   | Sweden       | 15482                      |
| 25   | Morocco      | 14935                      |
| 26   | Jordan       | 12932                      |
| 27   | Switzerland  | 12037                      |
| 28   | Lebanon      | 9325                       |
| 29   | Saudi        | 8901                       |
| 30   | Israel       | 8293                       |
| 31   | Afghanistan  | 7376                       |
| 32   | Ethiopia     | 7109                       |
| 33   | Algeria      | 6383                       |
| 34   | Libya        | 5822                       |
| 35   | China        | 5700                       |
| 36   | Palestine    | 5005                       |
| 37   | Nigeria      | 3092                       |
| 38   | Australia    | 2522                       |
| 39   | Kuwait       | 2474                       |
| 40   | Emirates     | 2182                       |
| 41   | Angola       | 1847                       |
| 42   | Somalia      | 1335                       |
| 43   | Singapore    | 839                        |
| 44   | Qatar        | 623                        |
| 45   | South Sudan  | 136                        |

Figure 14: pie chart presenting the percentage of cumulative deaths related to COVID-19 among the studied countries by mid of Jan. 2022 (left), ranking of cumulative deaths showing the order of Egypt that's written in red (right).

# New deaths COVID-19 (7-14/1/2022)

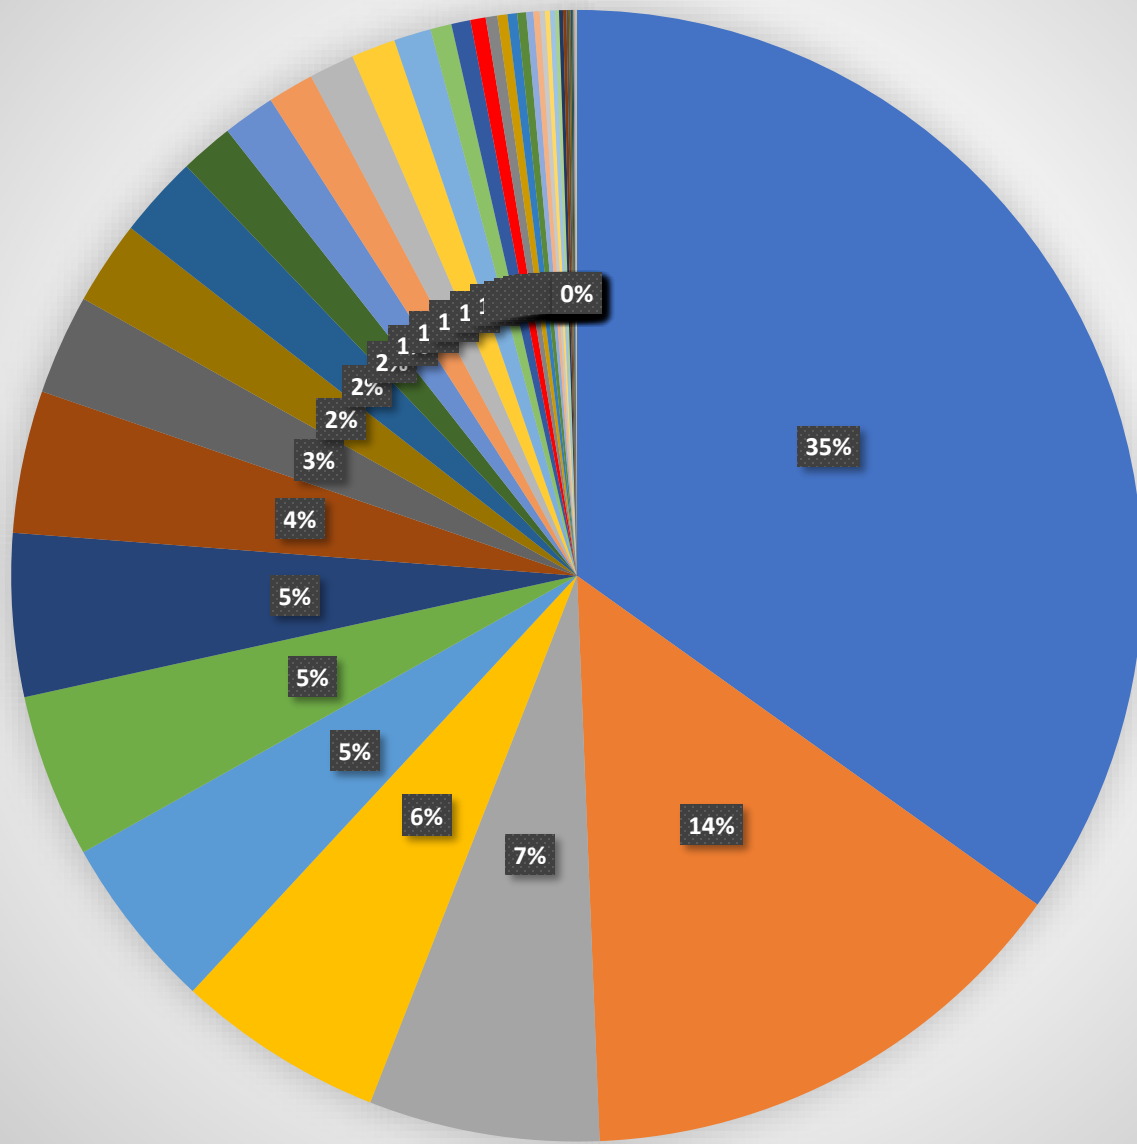

| Rank      | Country      | New_deaths COVID-19 |
|-----------|--------------|---------------------|
| 1         | USA          | 12769               |
| 2         | Russia       | 5307                |
| 3         | Poland       | 2413                |
| 4         | India        | 2172                |
| 5         | England      | 1827                |
| 6         | Italy        | 1714                |
| 7         | Germany      | 1705                |
| 8         | France       | 1490                |
| 9         | Turkey       | 1047                |
| 10        | south Africa | 877                 |
| 11        | Brazil       | 858                 |
| 12        | Canada       | 558                 |
| 13        | Greece       | 547                 |
| 14        | Mexico       | 482                 |
| 15        | Spain        | 474                 |
| 16        | Argentina    | 462                 |
| 17        | Colombia     | 389                 |
| 18        | Australia    | 221                 |
| 19        | Iran         | 200                 |
| <b>20</b> | <b>Egypt</b> | <b>160</b>          |
| 21        | Jordan       | 122                 |
| 22        | Ethiopia     | 104                 |
| 23        | Tunisia      | 101                 |
| 24        | Lebanon      | 94                  |
| 25        | Switzerland  | 74                  |
| 26        | Algeria      | 65                  |
| 27        | Libya        | 55                  |
| 28        | Morocco      | 52                  |
| 29        | Angola       | 51                  |
| 30        | Indonesia    | 42                  |
| 31        | Sweden       | 41                  |
| 32        | Iraq         | 35                  |
| 33        | Israel       | 26                  |
| 34        | south sudan  | 18                  |
| 35        | Japan        | 16                  |
| 36        | Saudi        | 13                  |
| 37        | Emirates     | 12                  |
| 38        | Afghanistan  | 10                  |
| 39        | Kuawit       | 5                   |
| 40        | Qatar        | 5                   |
| 41        | Singapore    | 4                   |
| 42        | China        | 1                   |
| 43        | Palestine    | 0                   |
| 44        | Nigeria      | 0                   |
| 45        | Somalia      | 0                   |

Figure 15: pie chart presenting the percentage of new deaths related to COVID-19 among the studied countries by mid of Jan. 2022 (left), ranking of new deaths showing the order of Egypt that's written in red (right).
